# Supplementary material for: Half-sandwich RuCl2(η6-p-cymene) core complexes containing sulfur donor aroylthiourea ligands: DNA and protein binding, DNA cleavage and cytotoxic studies
Source: Royal Society of Chemistry journal article supplement (doi:10.1039/c6dt01167e), 2016-01-01
Supplement: c6dt01167e1.pdf [file c6dt01167e1.pdf]

## Supplementary information

### **Half-sandwich RuCl<sub>2</sub>( $\eta^6$ -*p*-cymene) core complexes containing sulfur donor aroylthiourea ligand: DNA and protein binding, DNA cleavage and cytotoxic studies**

Kumaramangalam Jeyalakshmi, Jebiti Haribabu, Nattamai S. P. Bhuvanesh and Ramasamy Karvembu

<sup>a</sup>Department of Chemistry, National Institute of Technology, Tiruchirappalli 620015, India

<sup>b</sup>Department of Chemistry, Texas A & M University, College Station, TX 77842, USA

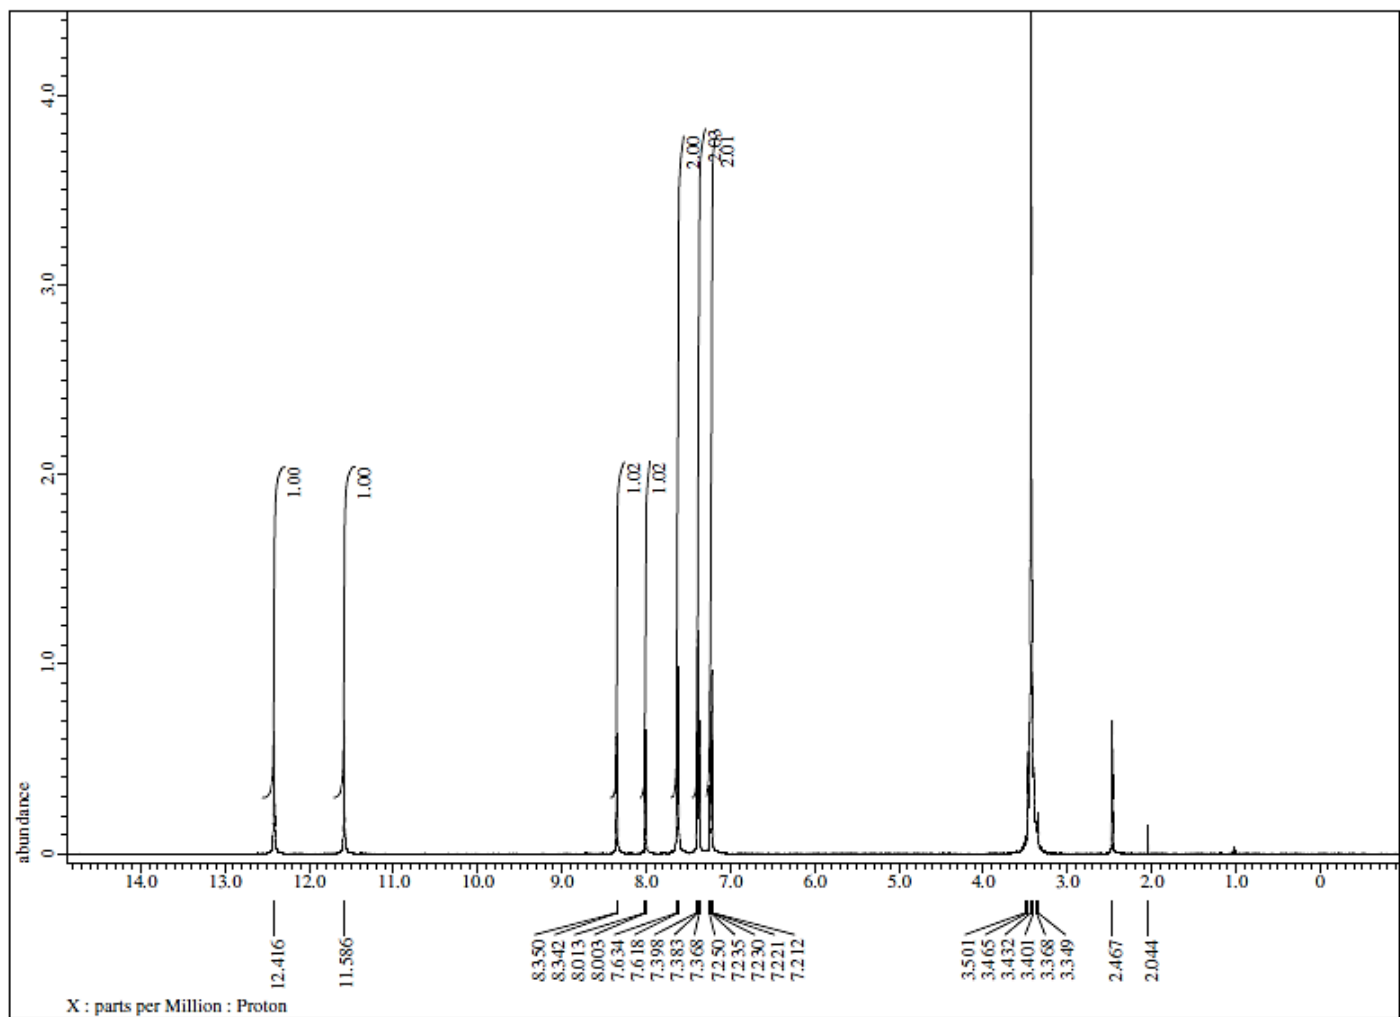

**Fig. S1**  $^1\text{H}$  NMR spectrum of the L1.

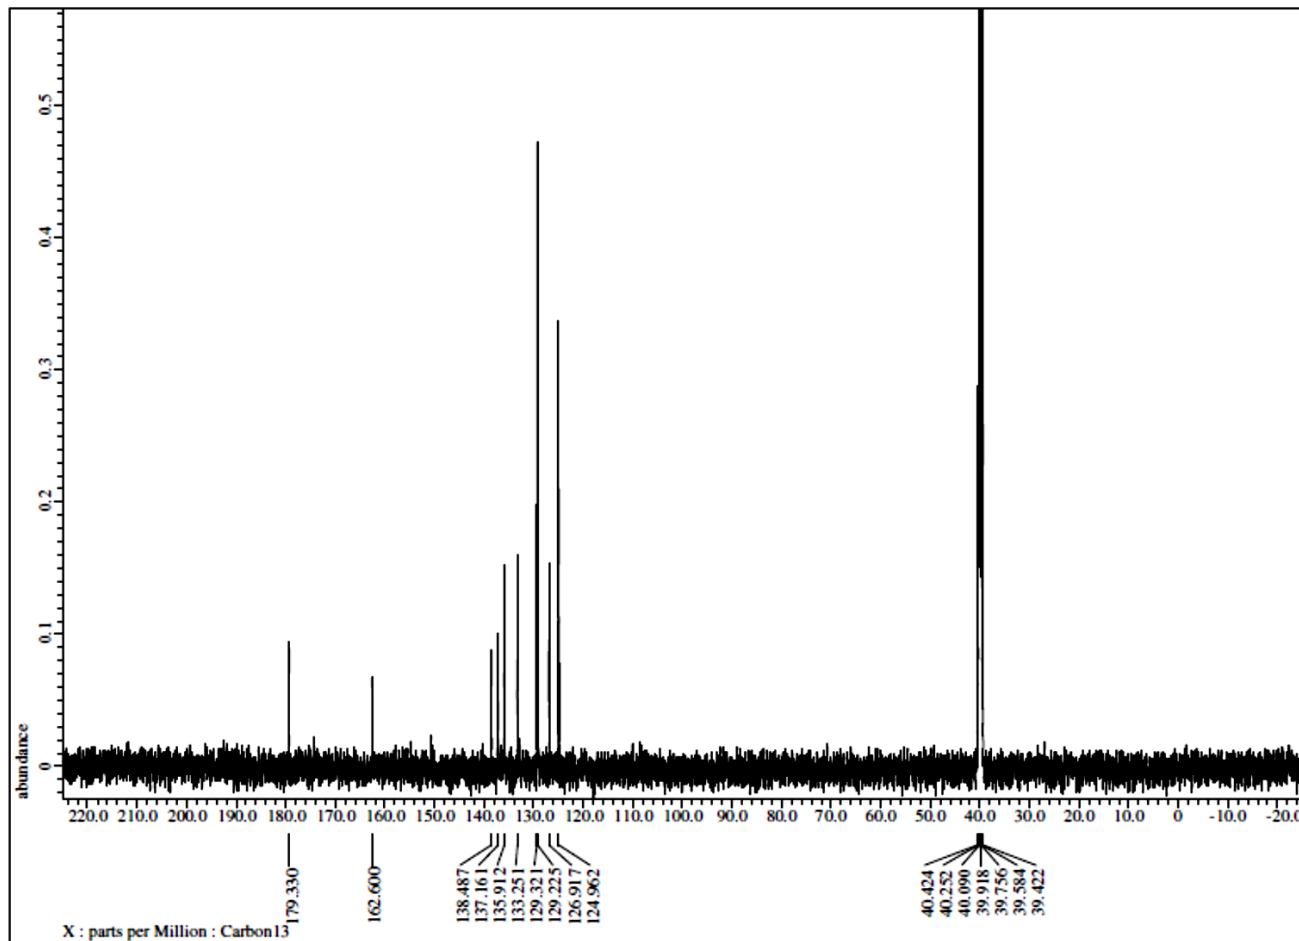

**Fig. S2**  $^{13}\text{C}$  NMR spectrum of L1.

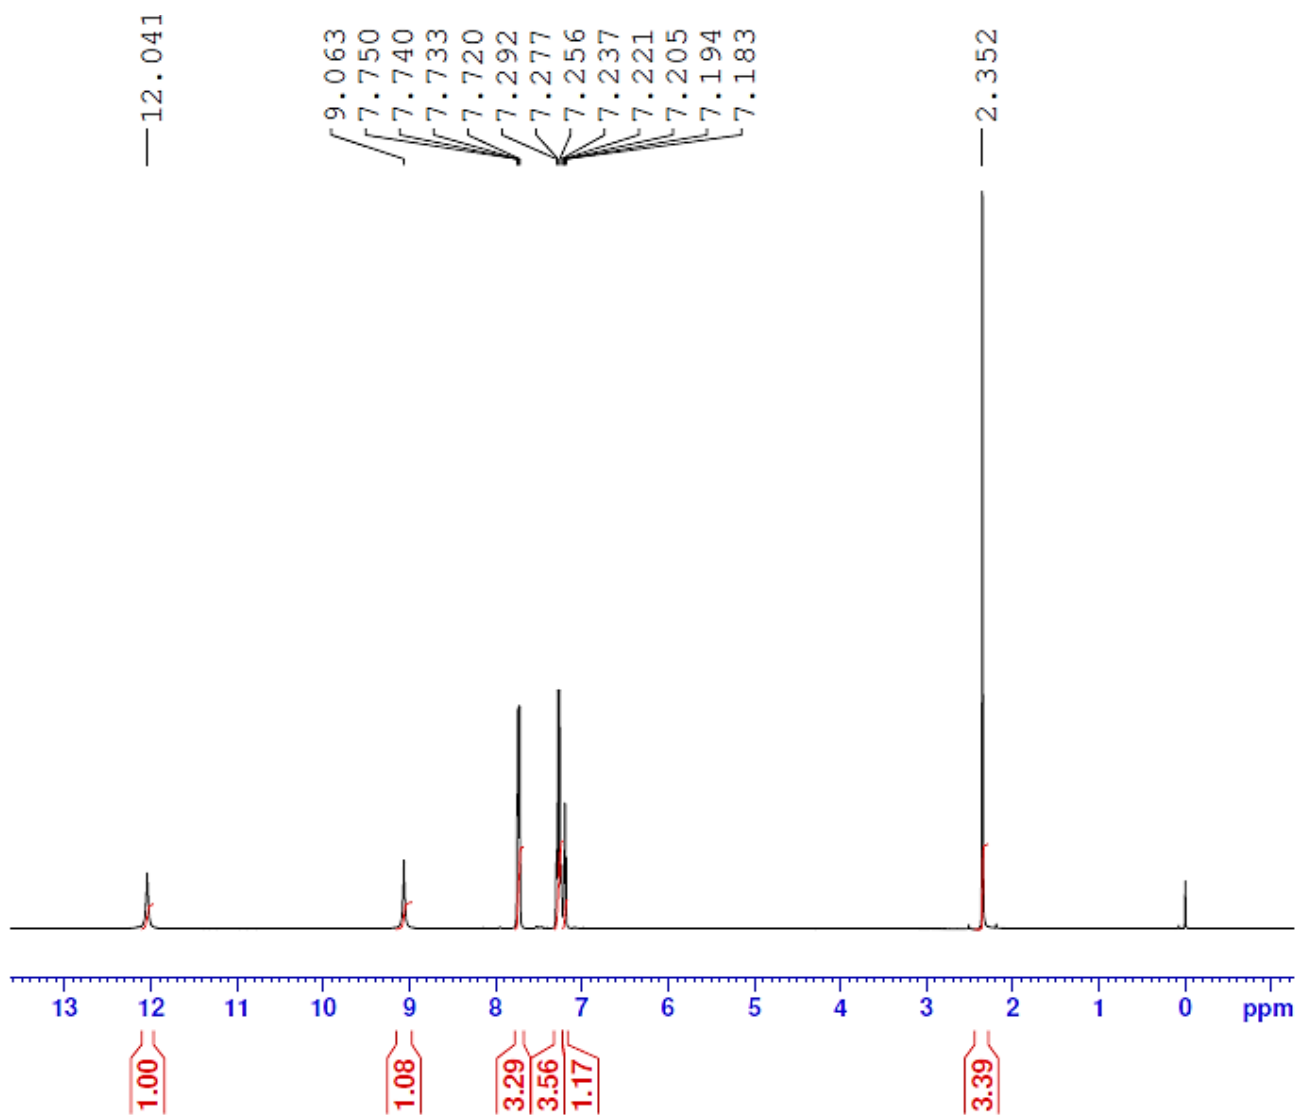

Fig. S3  $^1\text{H}$  NMR spectrum of L2.

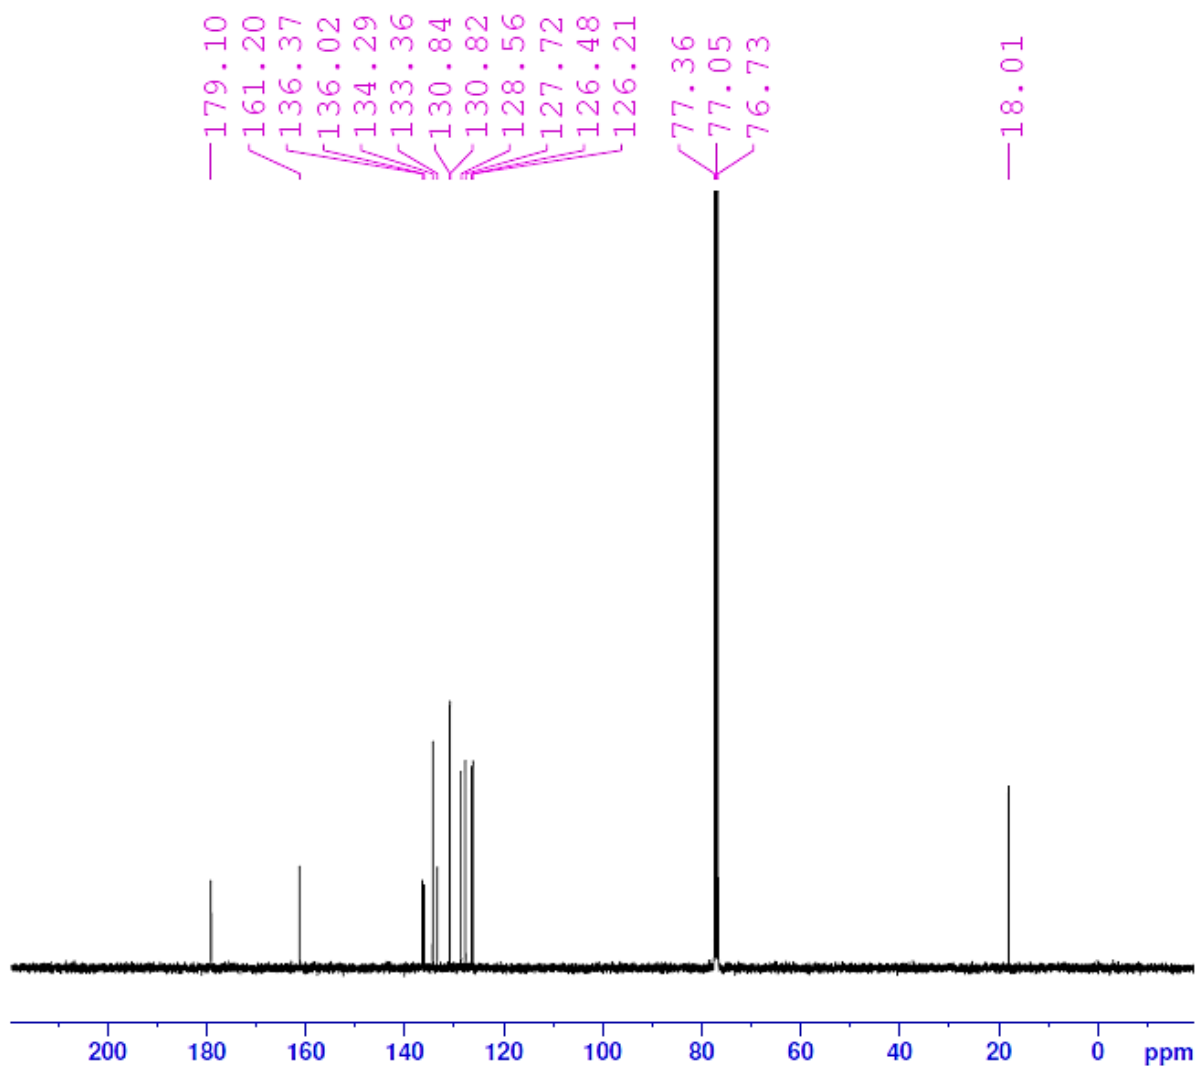

**Fig. S4**  $^{13}\text{C}$  NMR spectrum of L2.

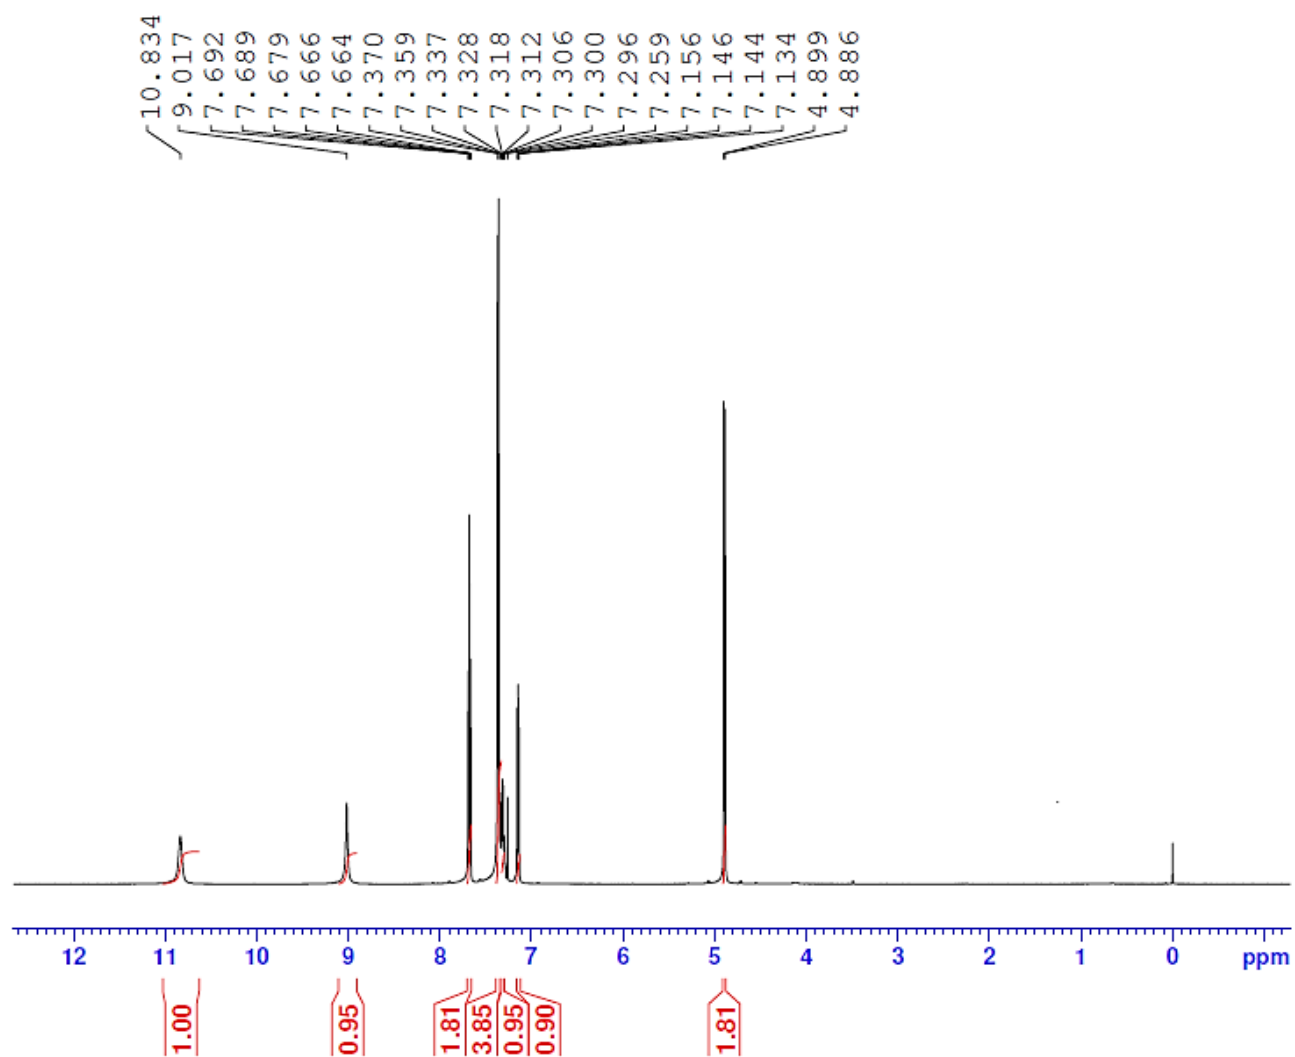

Fig. S5 <sup>1</sup>H NMR spectrum of L3.

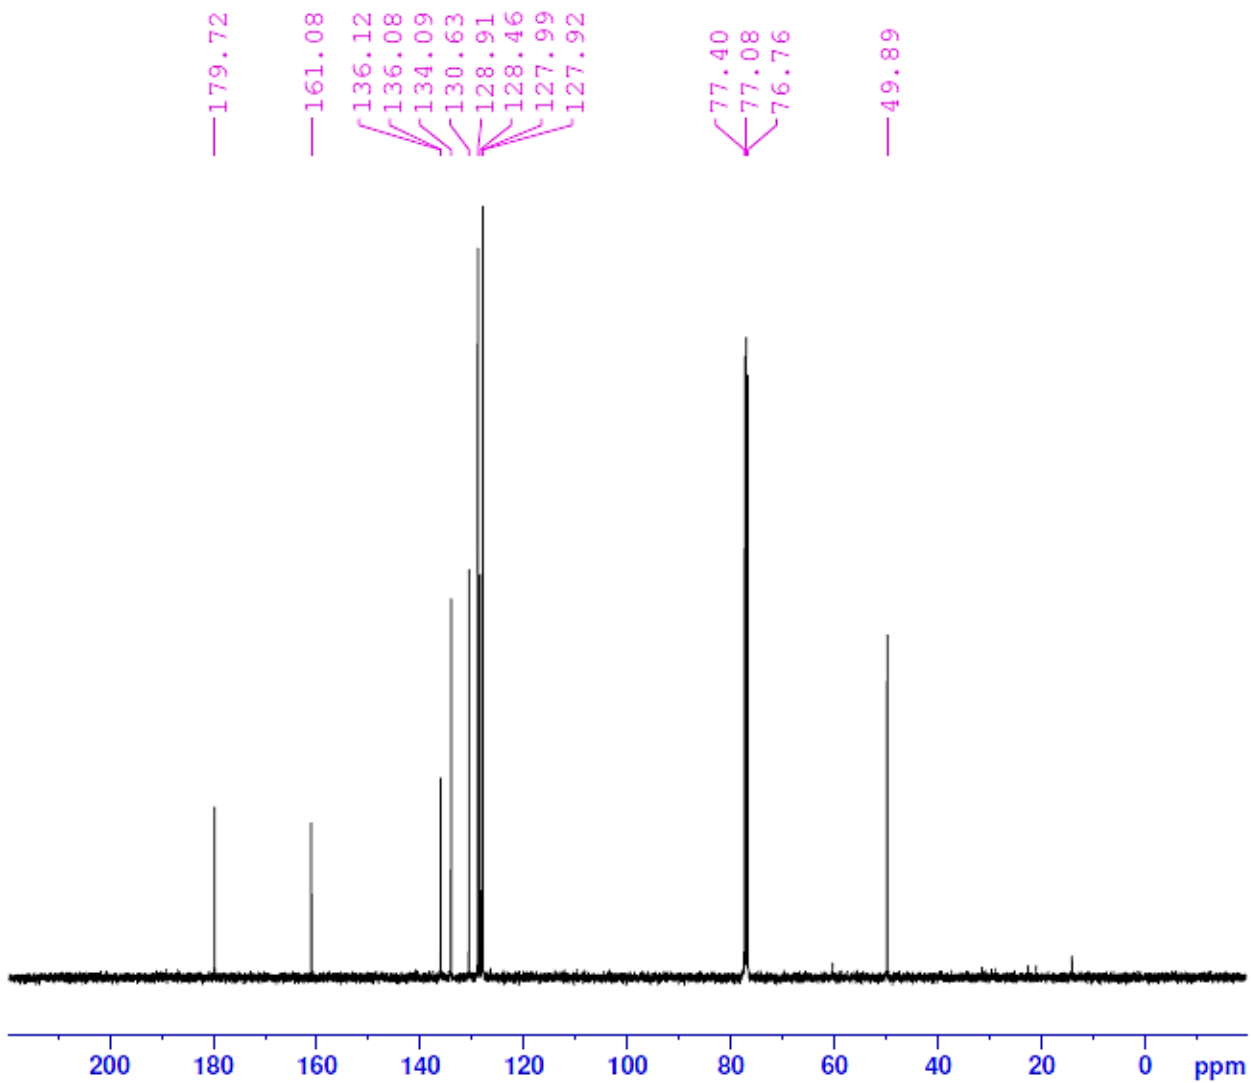

**Fig. S6** <sup>13</sup>C NMR spectrum of L3.

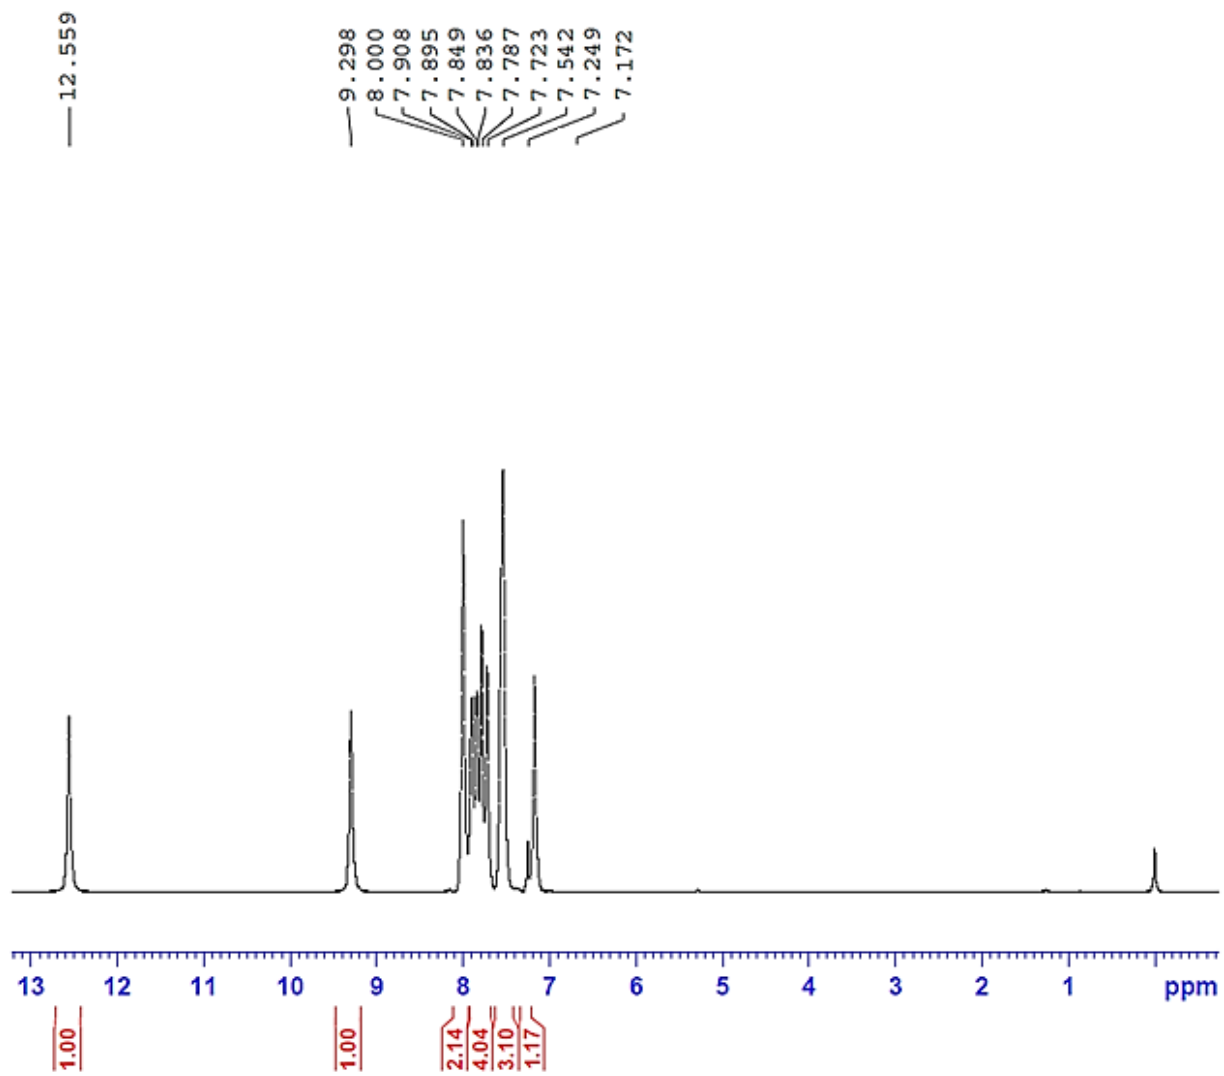

Fig. S7  $^1\text{H}$  NMR spectrum of L4.



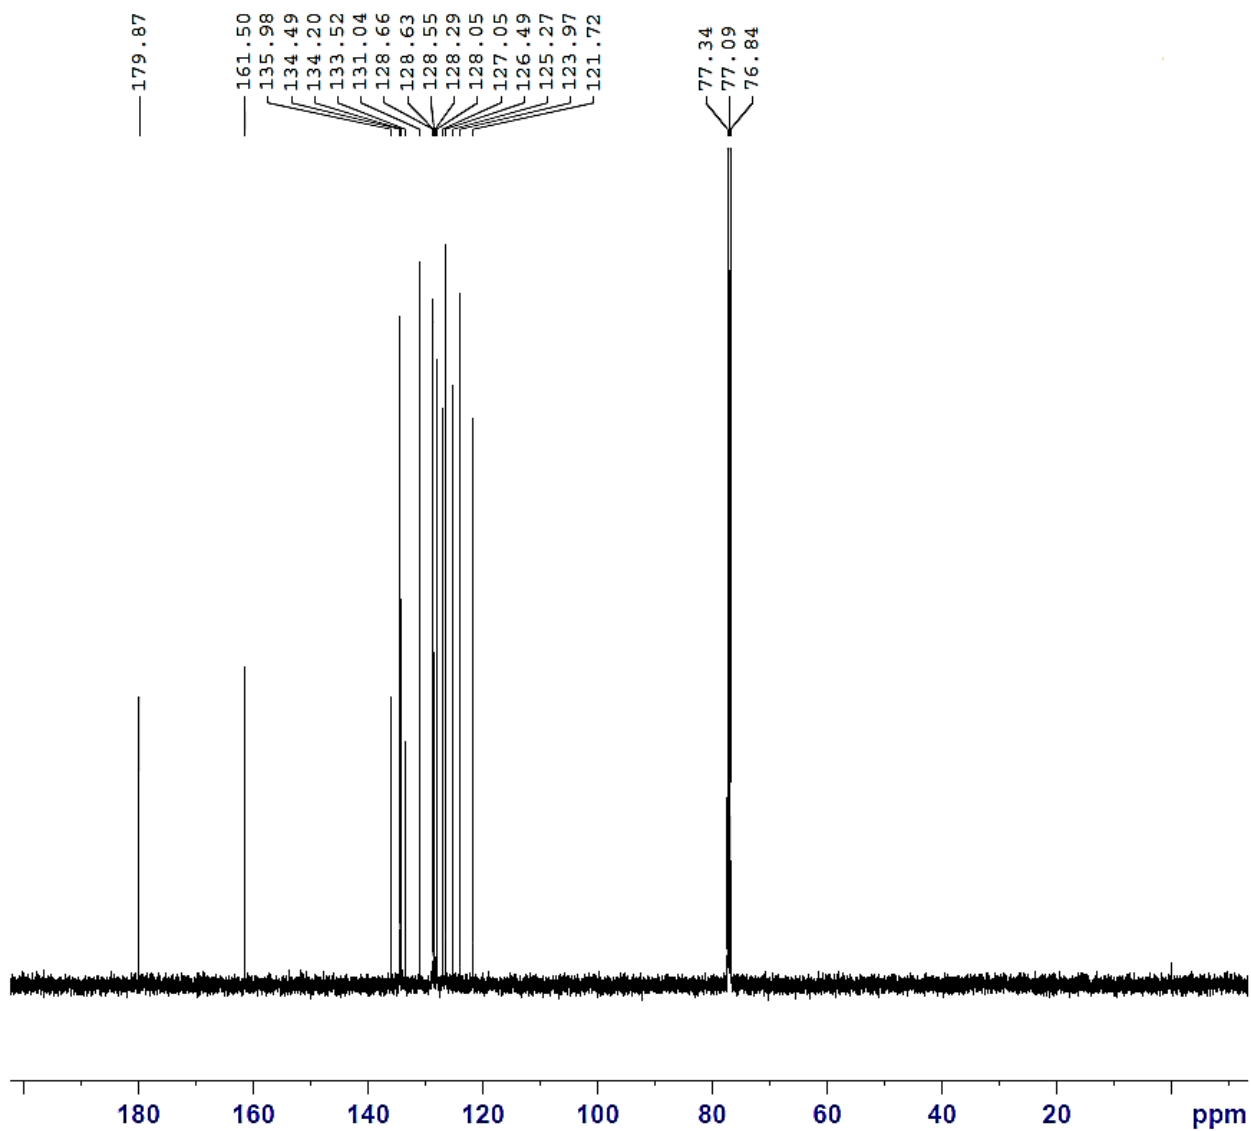

**Fig. S8**  $^{13}\text{C}$  NMR spectrum of L4.

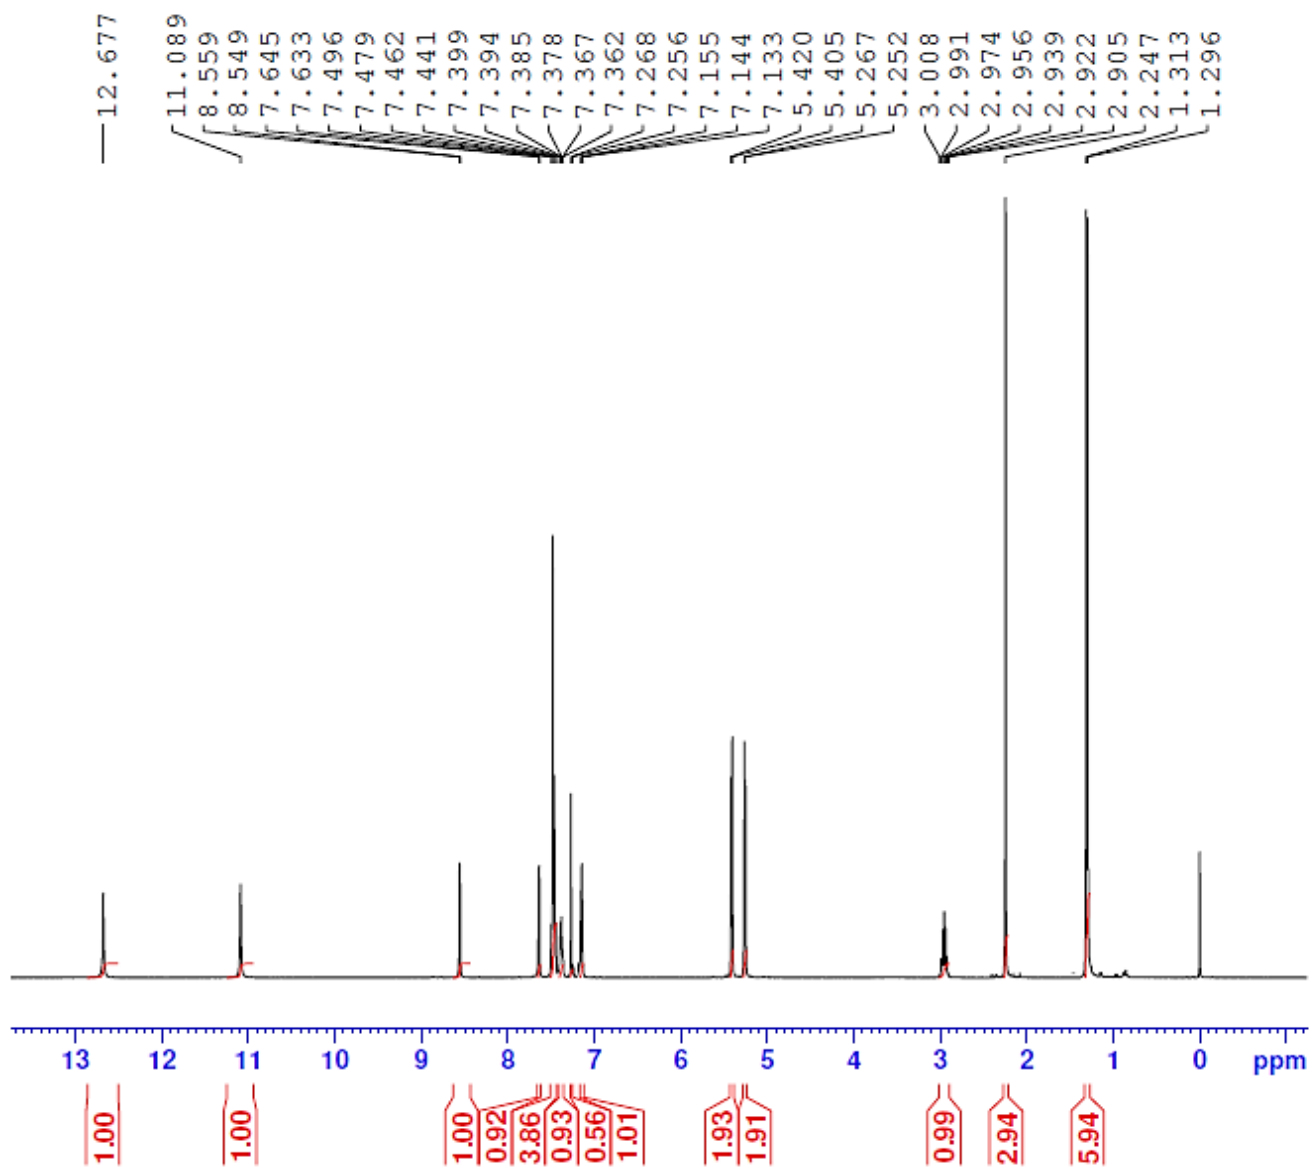

Fig. S9  $^1\text{H}$  NMR spectrum of **1**.

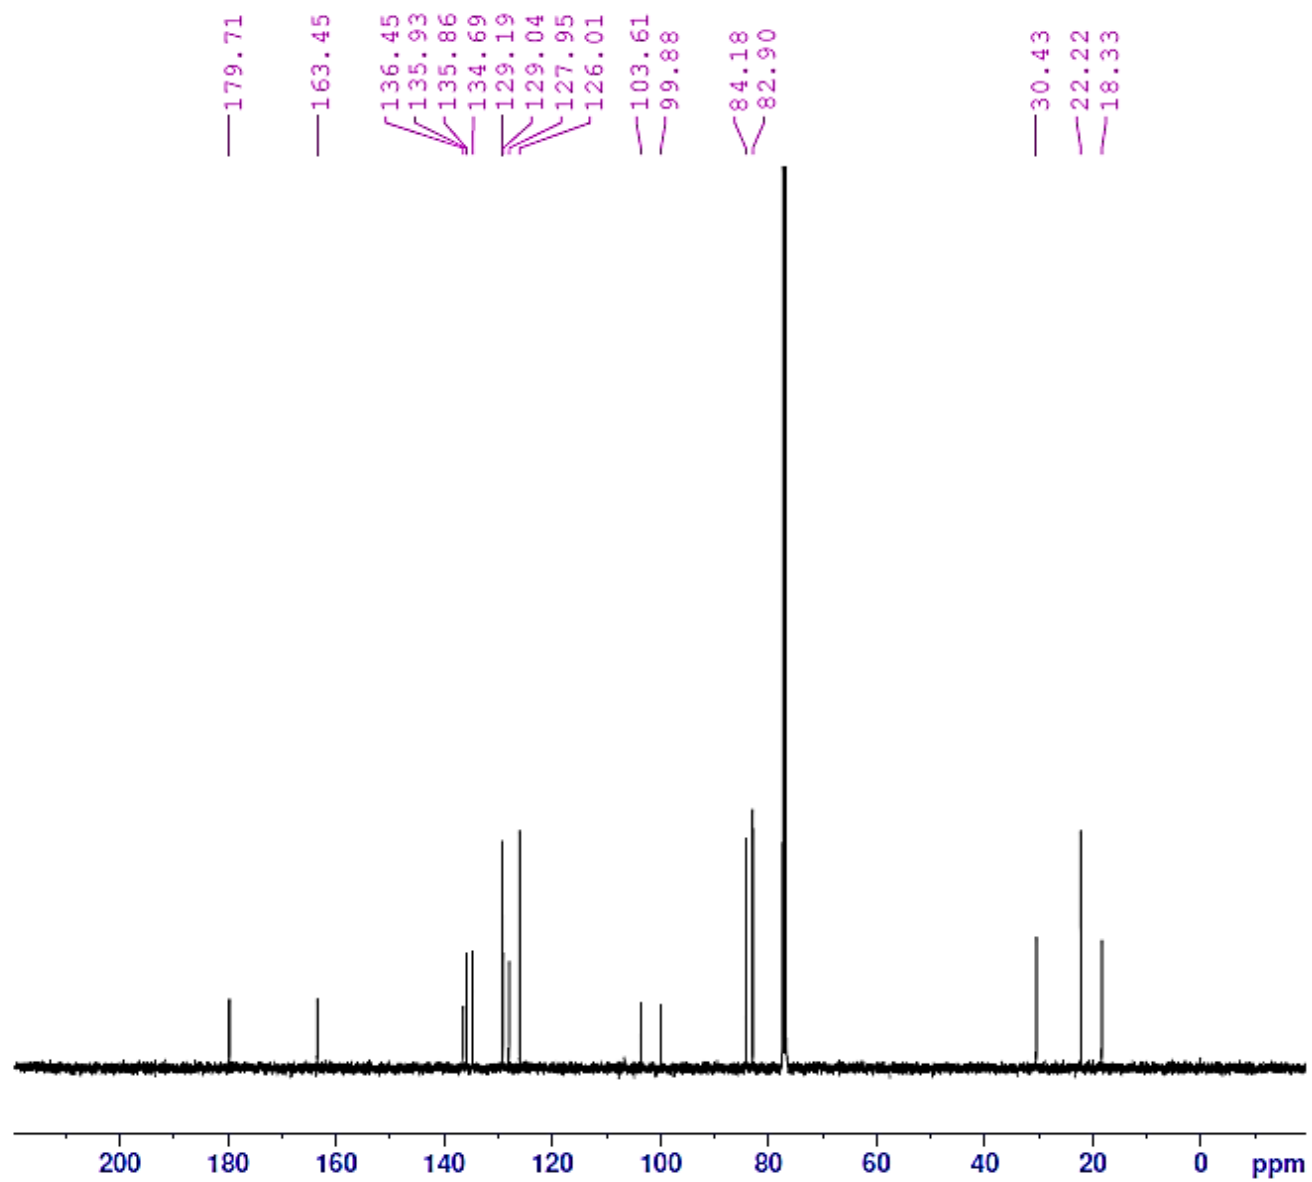

**Fig. S10**  $^{13}\text{C}$  NMR spectrum of **1**.

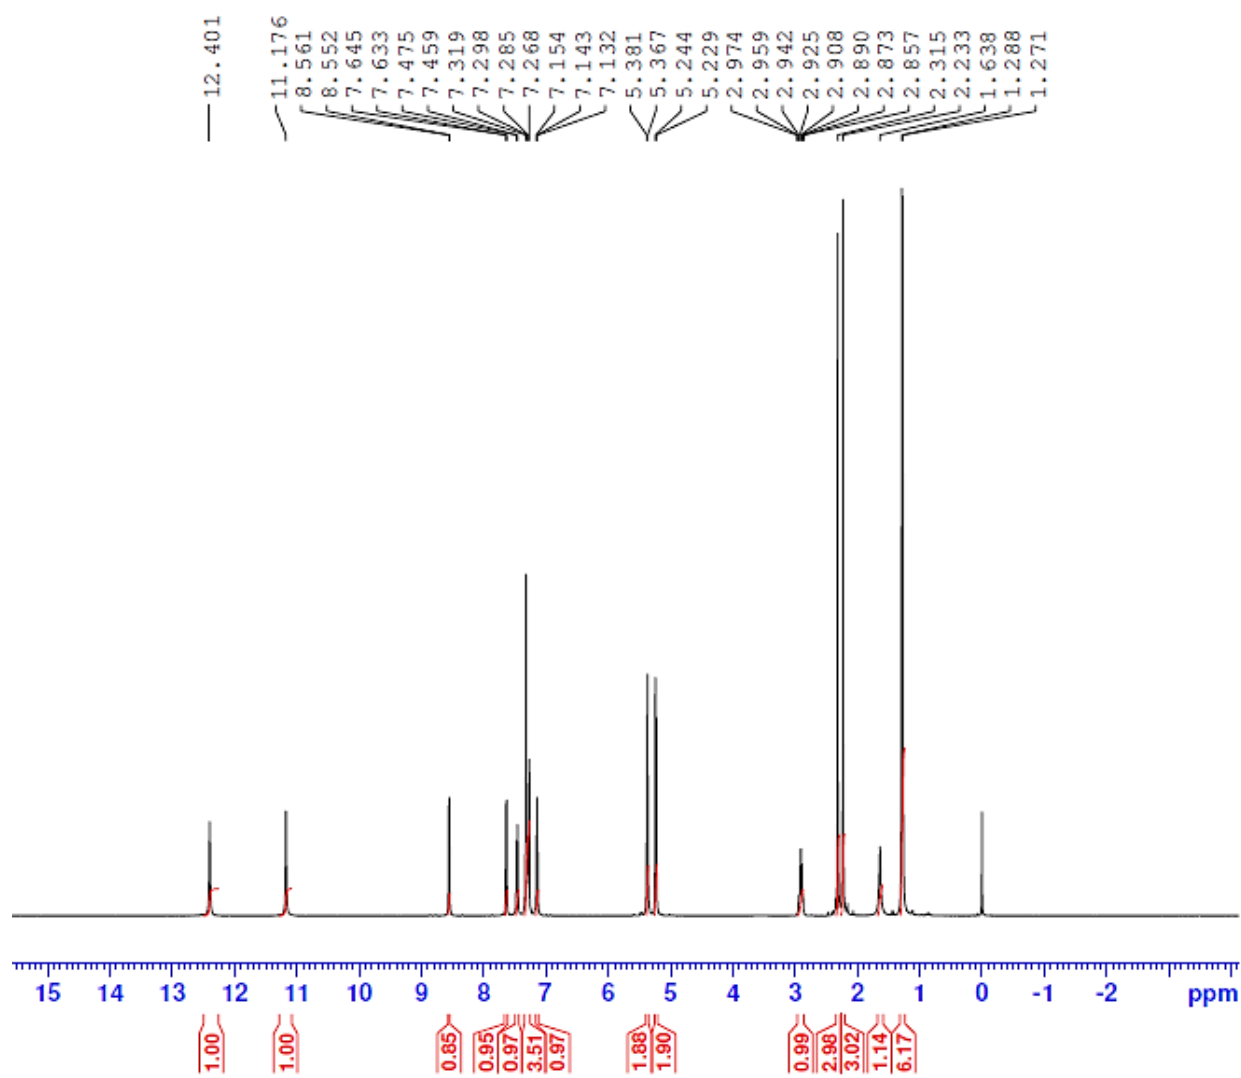

**Fig. S11**  $^1\text{H}$  NMR spectrum of **2**.

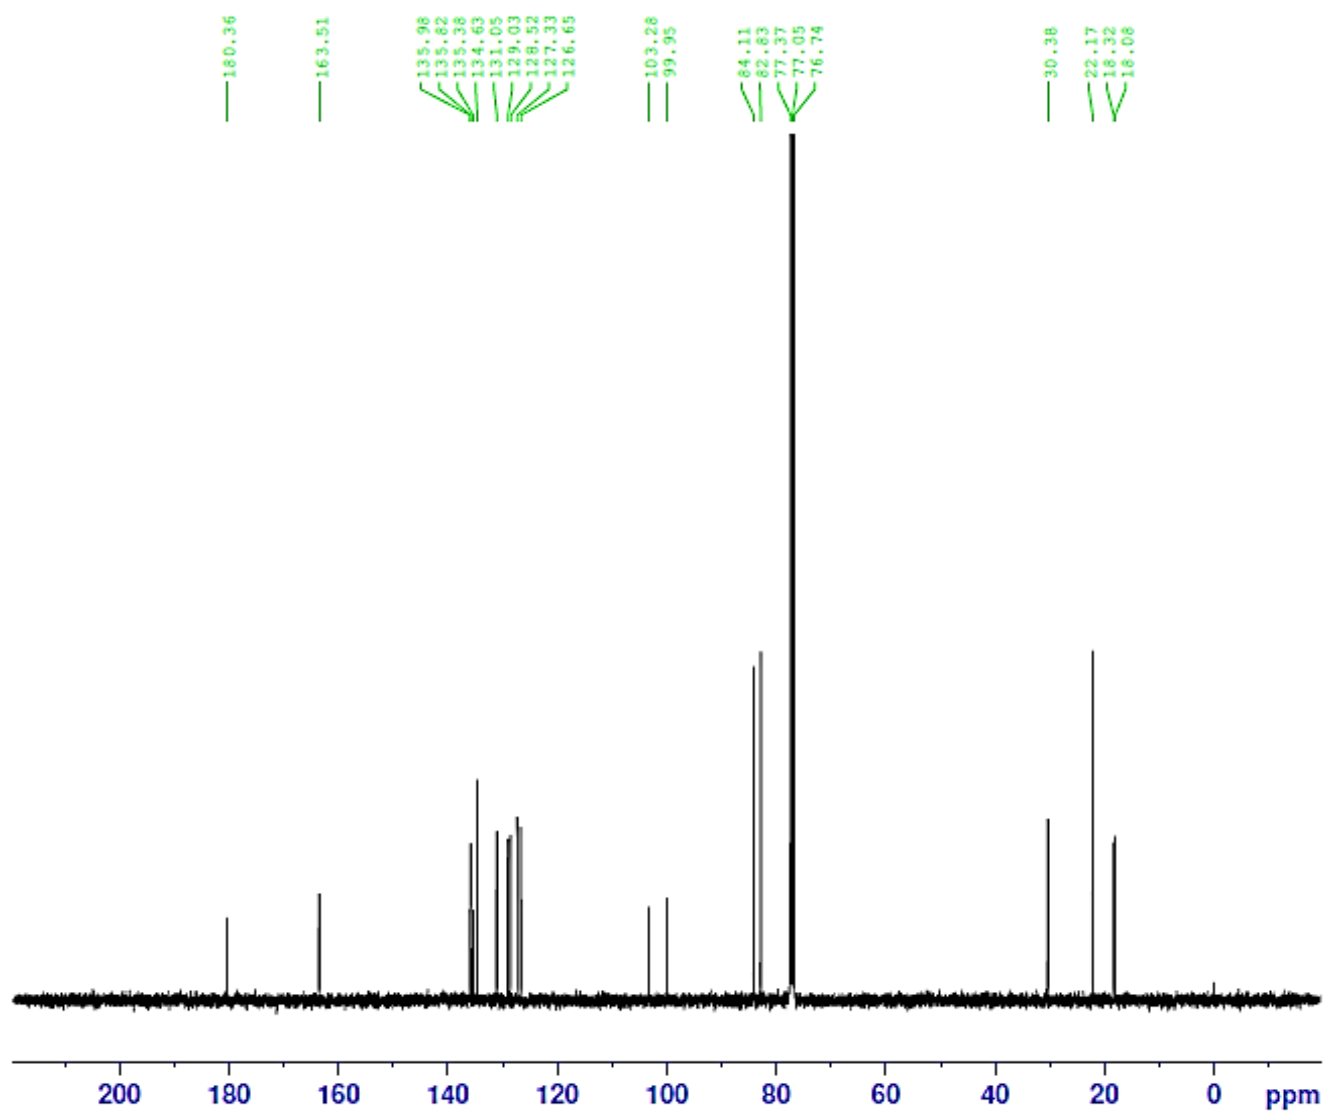

**Fig. S12**  $^{13}\text{C}$  NMR spectrum of **2**.

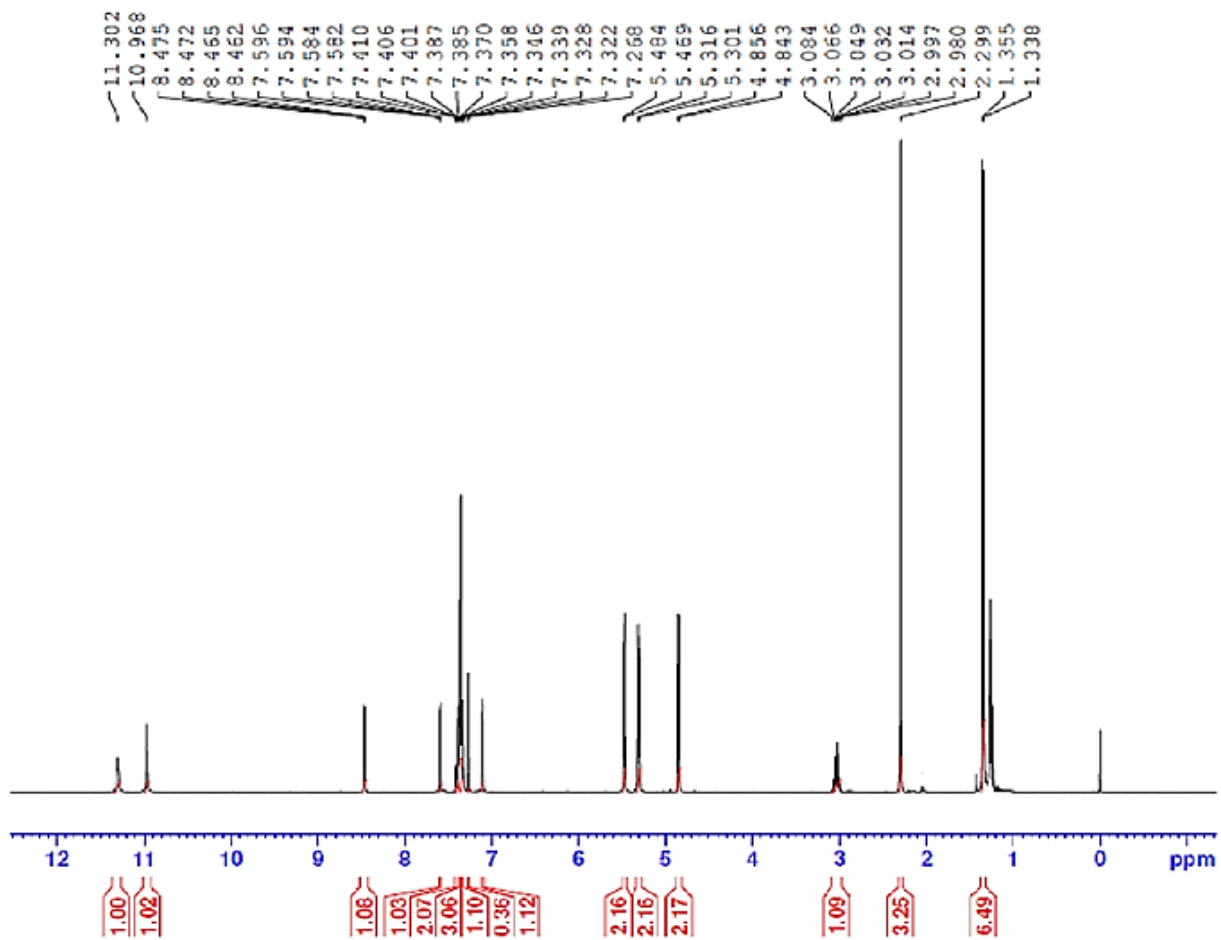

Fig. S13  $^1\text{H}$  NMR spectrum of **3**.

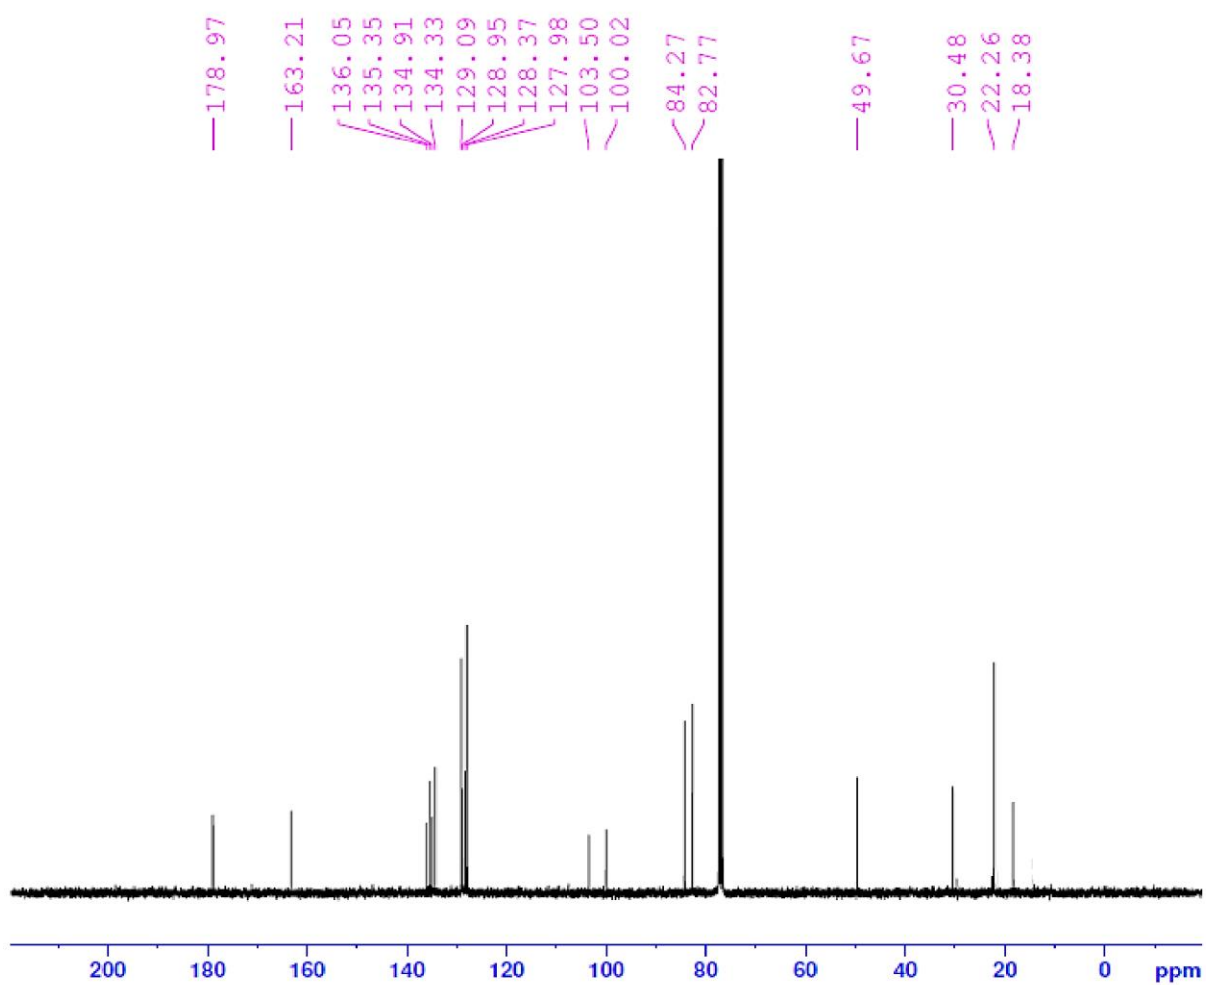

**Fig. S14**  $^{13}\text{C}$  NMR spectrum of **3**.

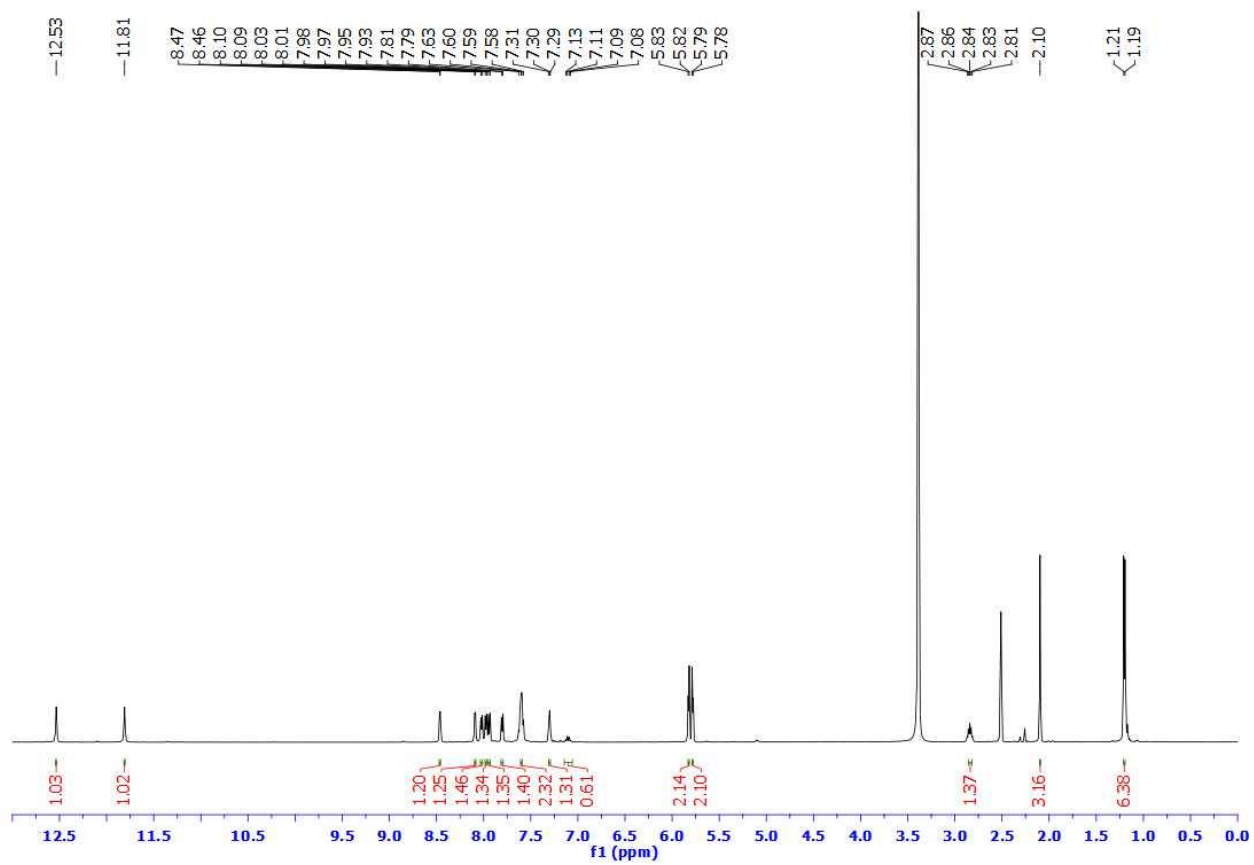

Fig. S15  $^1\text{H}$  NMR spectrum of 4.



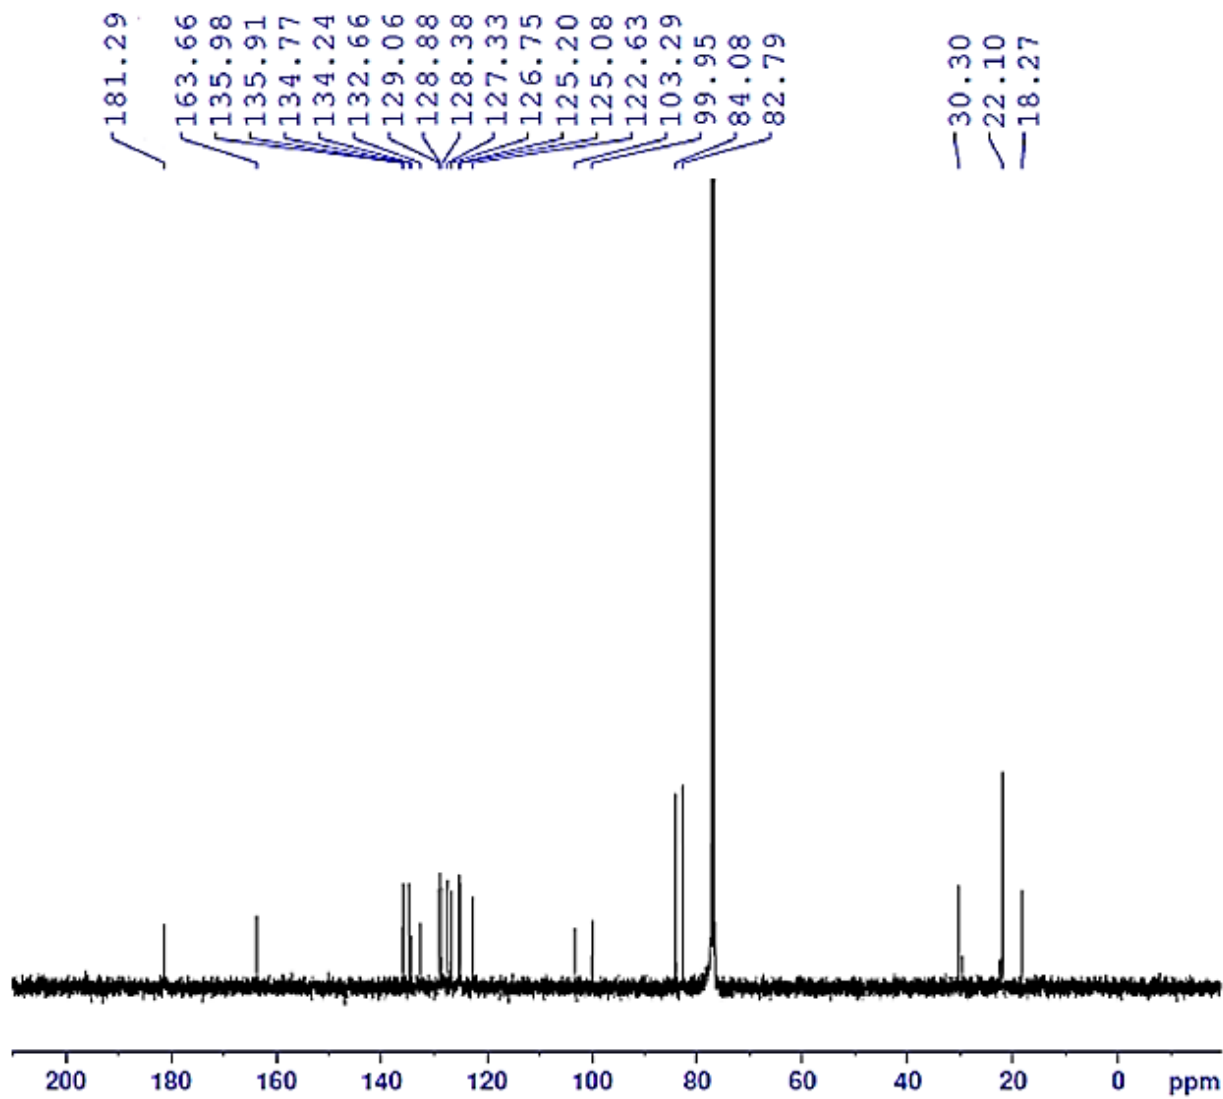

Fig. S16  $^{13}\text{C}$  NMR spectrum of **4**.

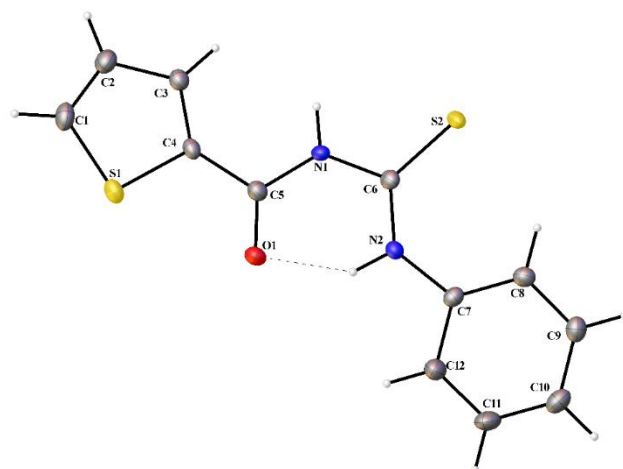

**Fig. S17** Molecular structure of L1.

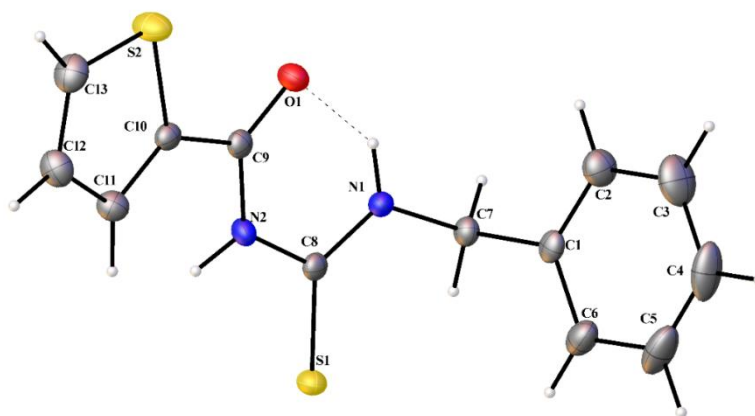

**Fig. S18** Molecular structure of L3.

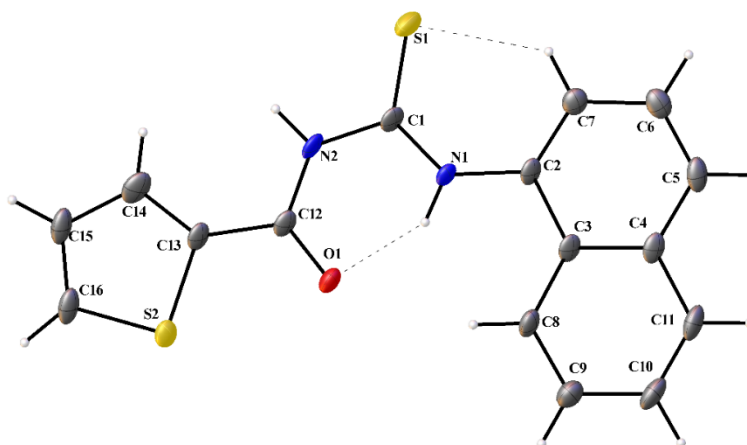

**Fig. S19** Molecular structure of L4.

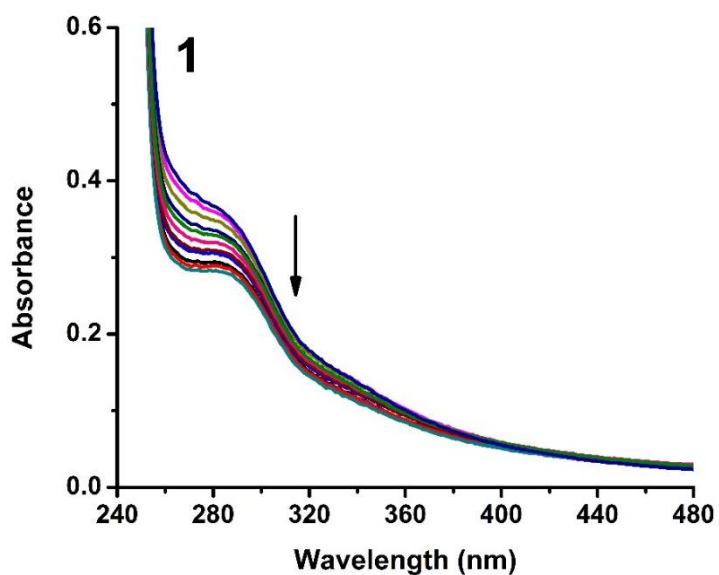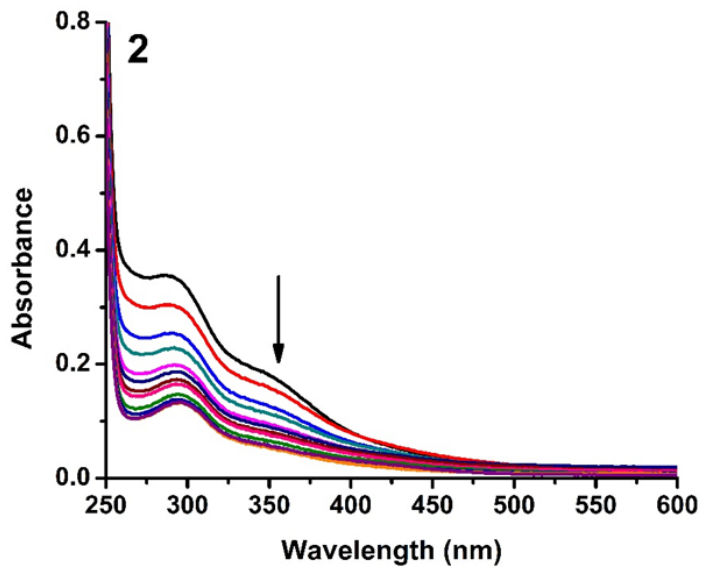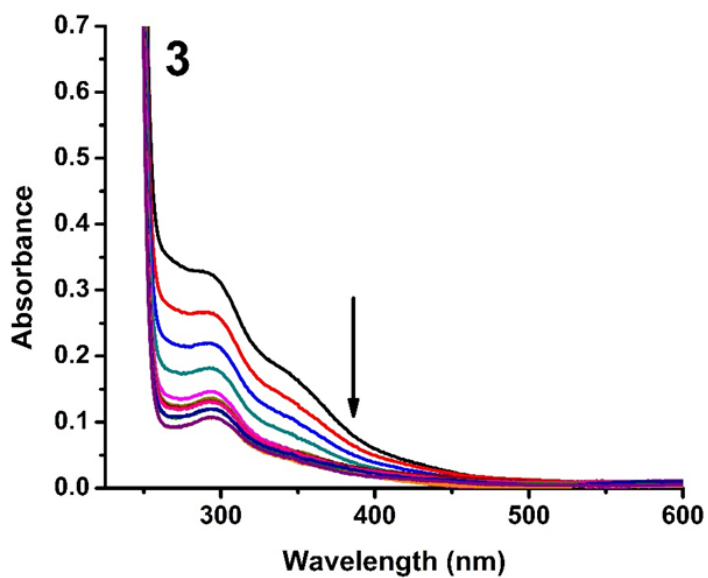

**Fig. S20** Absorption spectra of complexes (1-3) in Tris-HCl buffer upon addition of CT DNA. [complex] =  $2.5 \times 10^{-5}$  M, [DNA] = 0-60  $\mu$ M. The arrow shows that the absorption intensity decreases upon increasing the DNA concentration.

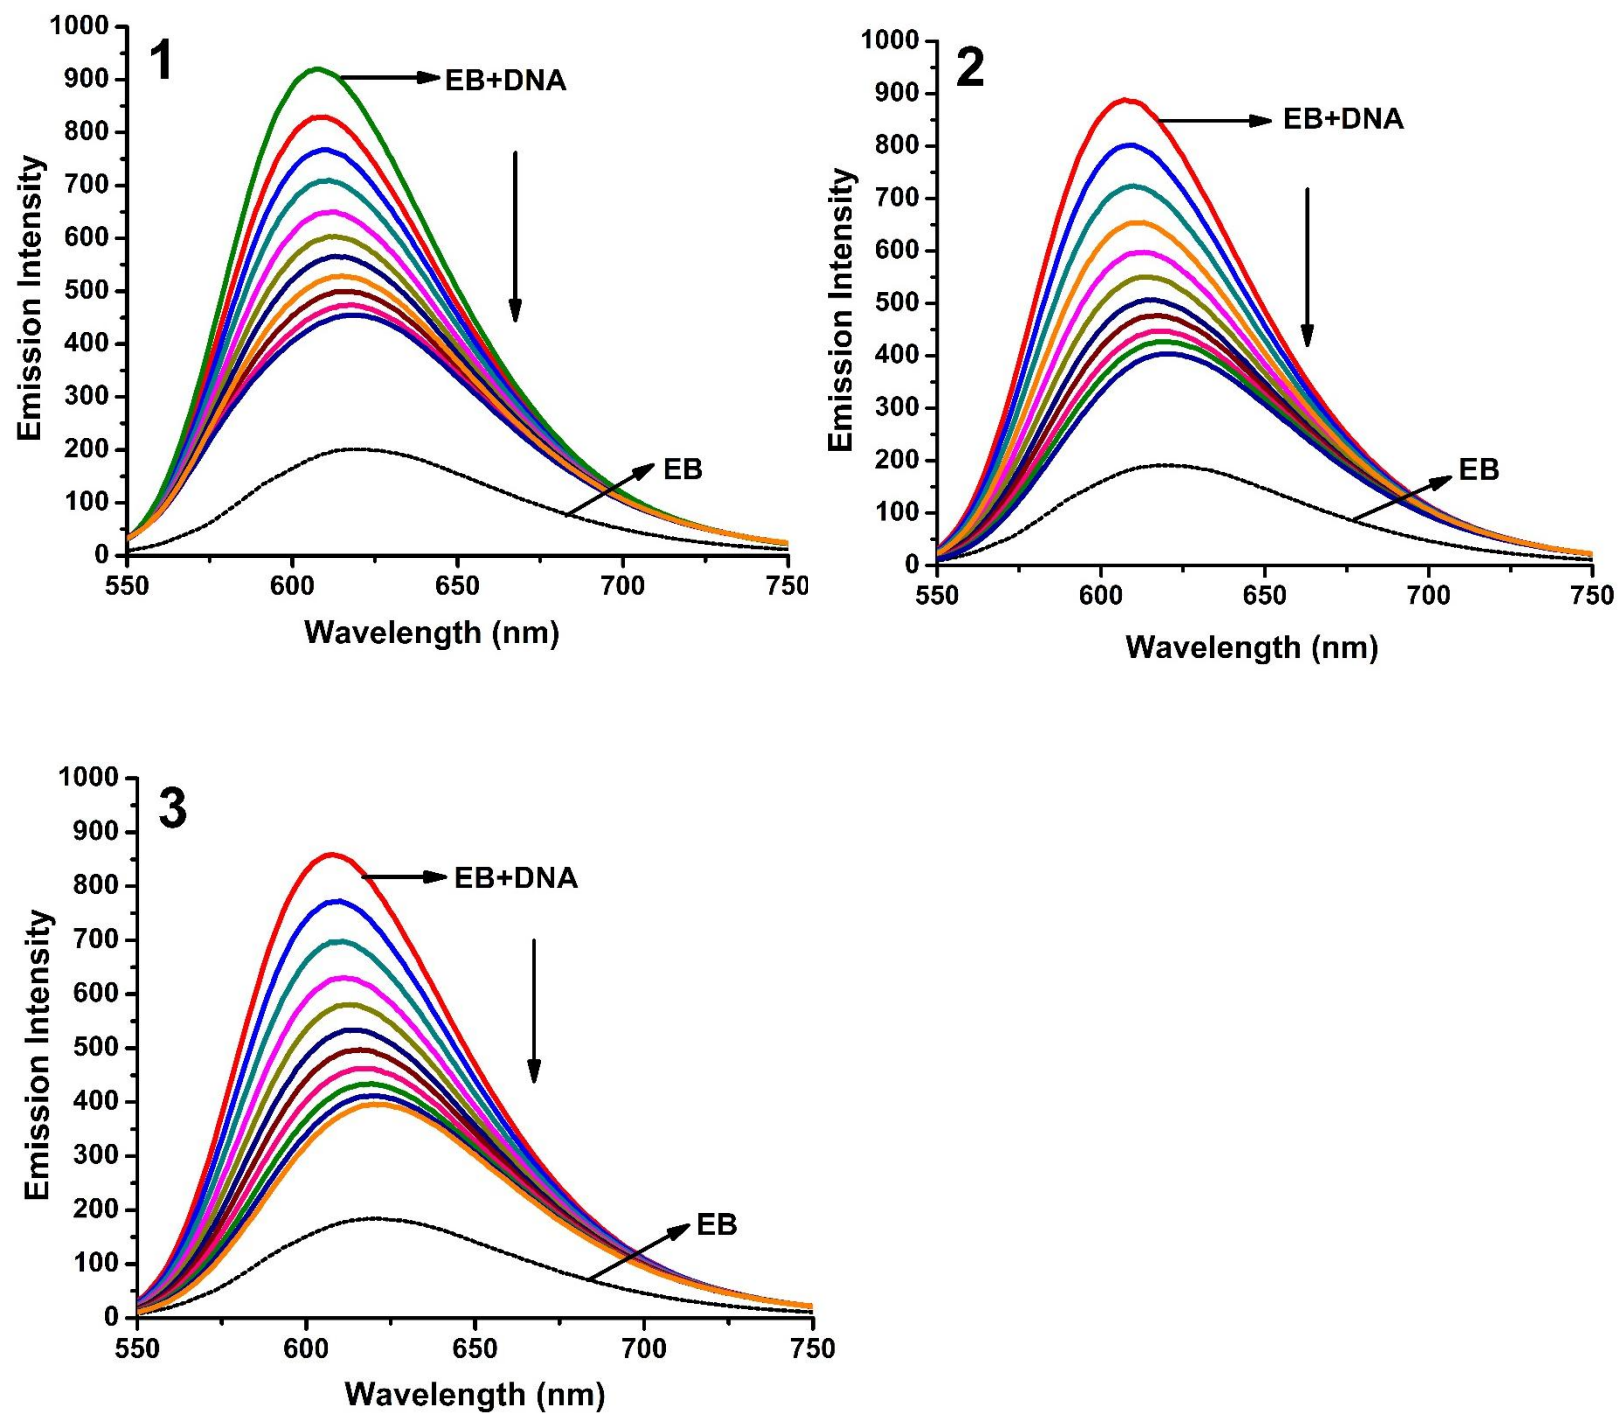

**Fig. S21** Fluorescence quenching curves of EB bound to DNA in the presence of **1-3**. [DNA] = 5  $\mu$ M, [EB] = 5  $\mu$ M and [complex] = 0-50  $\mu$ M.

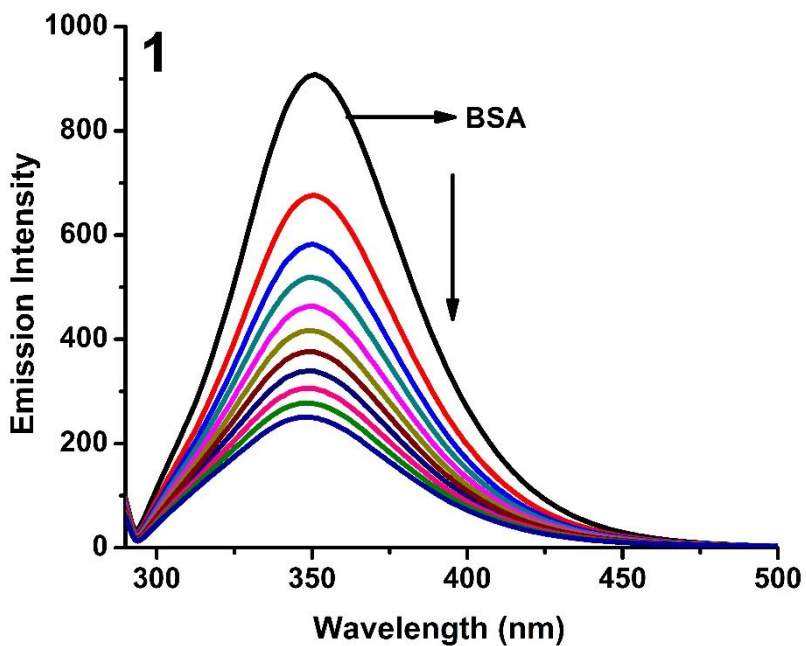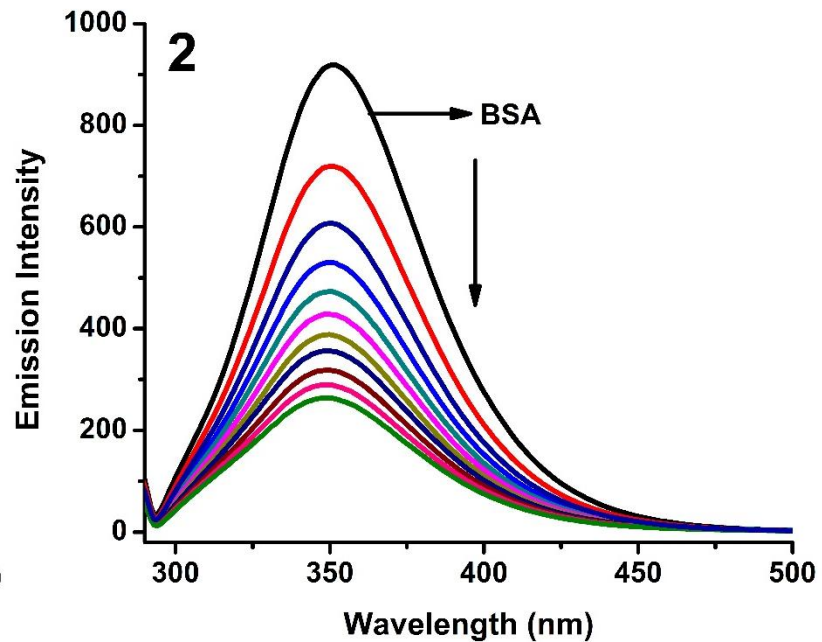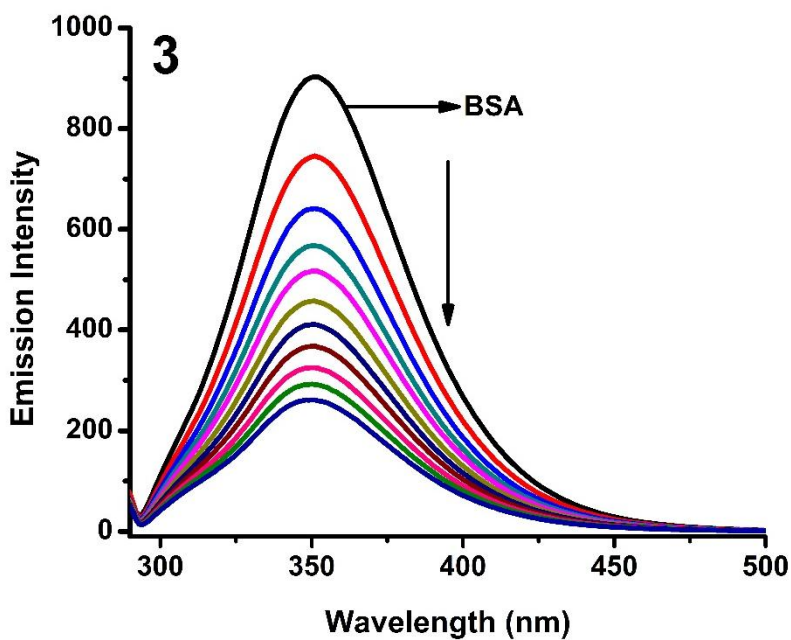

**Fig. S22** Fluorescence quenching curves of BSA in the absence and presence of **1-3**. [BSA] = 1  $\mu$ M and [complex] = 0-20  $\mu$ M.

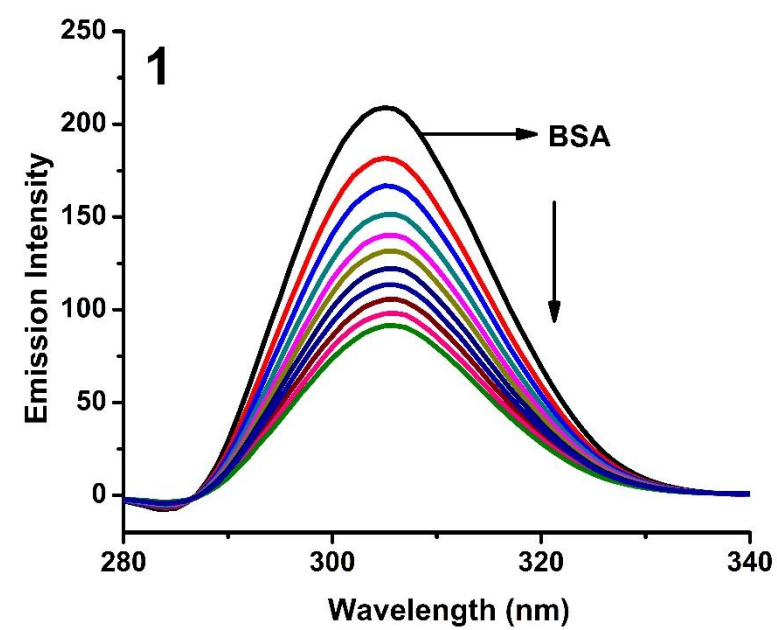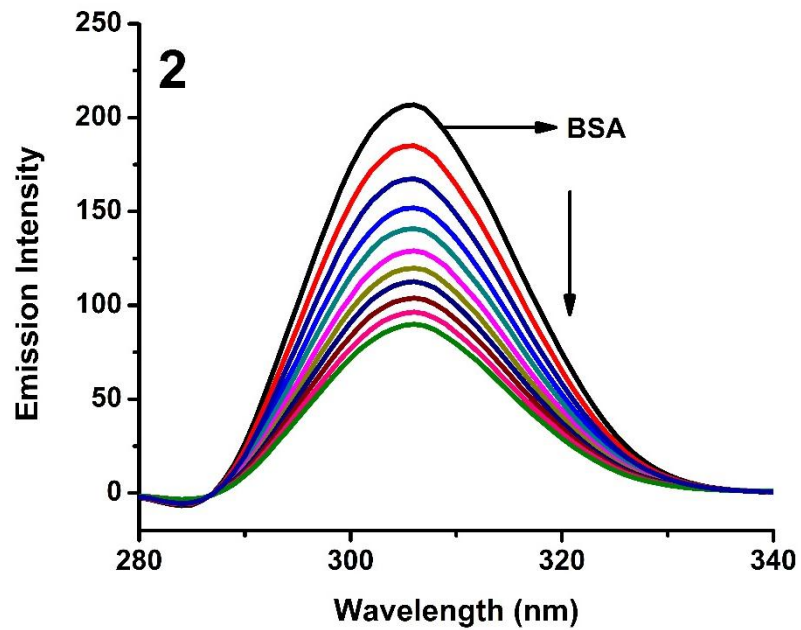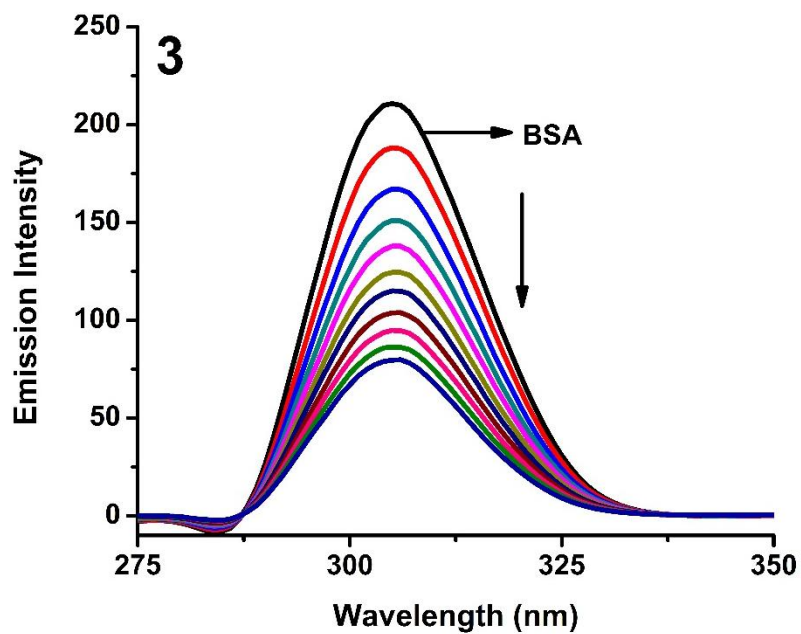

**Fig. S23** Synchronous spectra of BSA (1  $\mu\text{M}$ ) as a function of concentration of 1-3 (0-20  $\mu\text{M}$ ) with  $\Delta\lambda = 15$  nm.

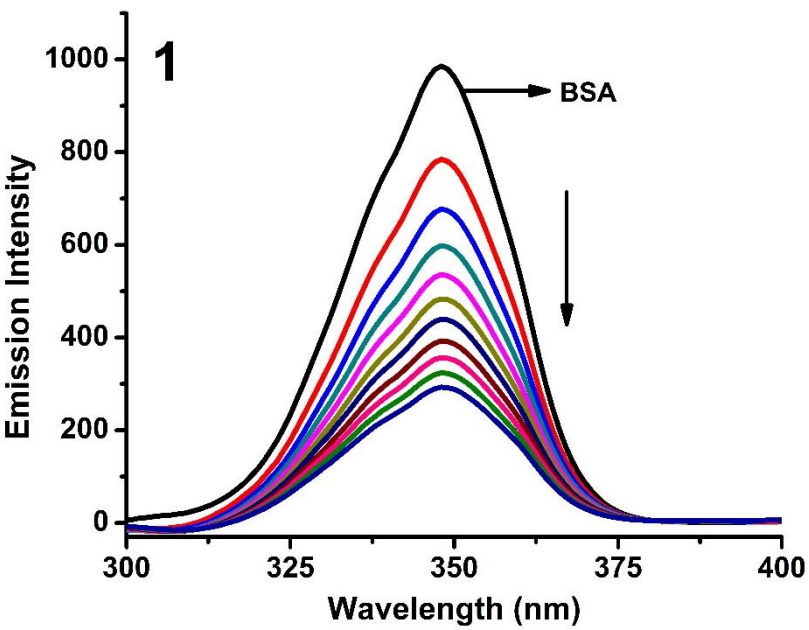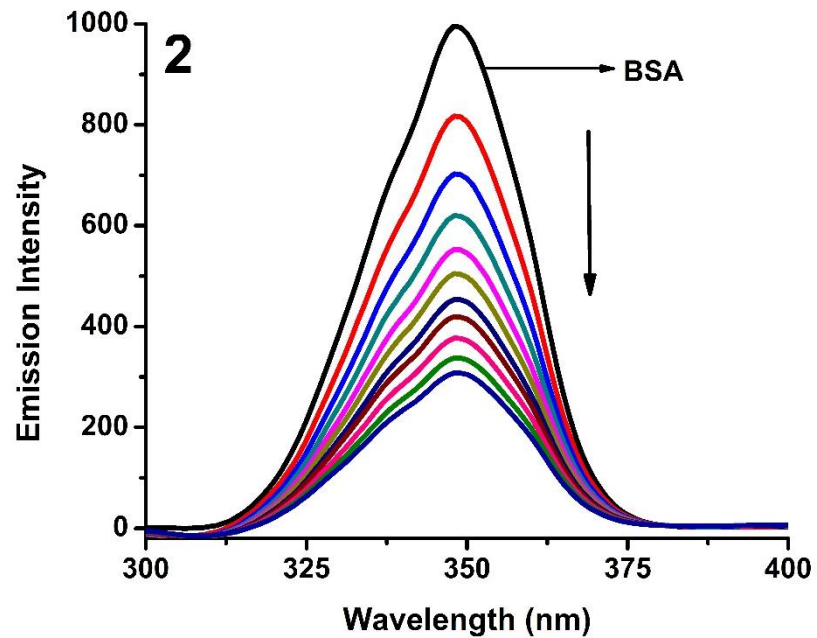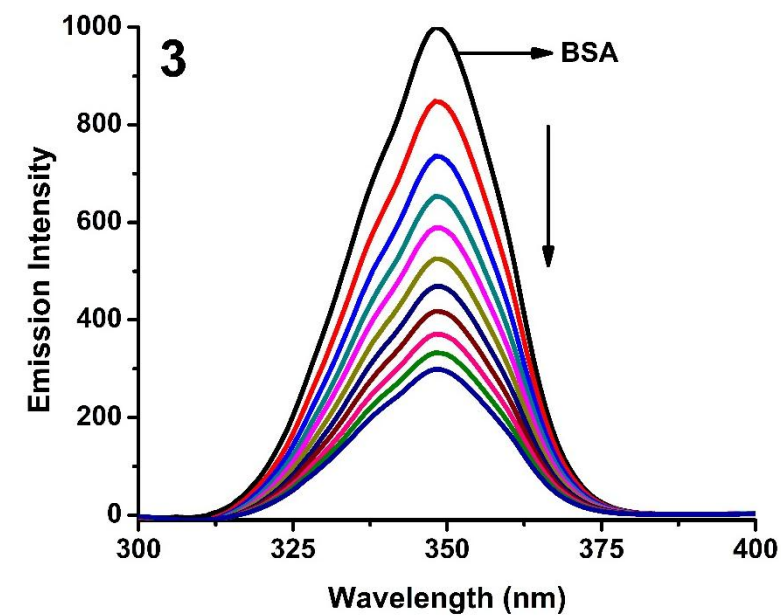

**Fig. S24** Synchronous spectra of BSA (1  $\mu\text{M}$ ) as a function of concentration of **1-3** (0-20  $\mu\text{M}$ ) with  $\Delta\lambda = 60$  nm.

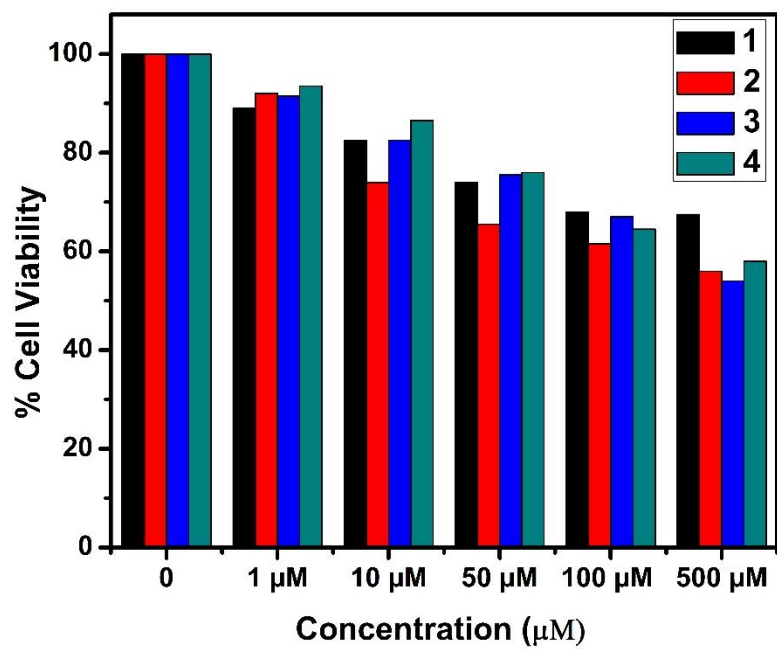

**Fig. S25** Cytotoxicity of complexes **1-4** after 24 h incubation on L929 cell lines.



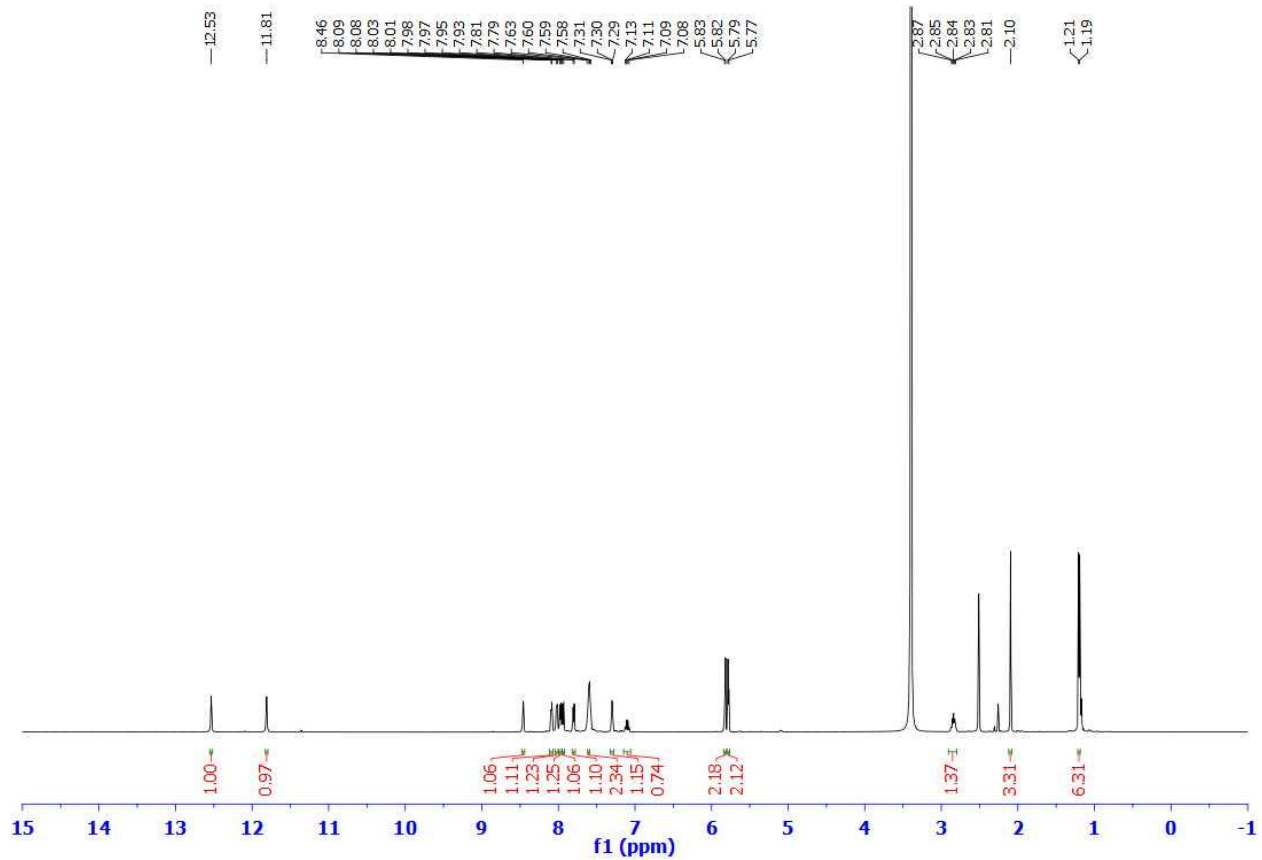

**Fig. S26**  $^1\text{H}$  NMR spectrum of **4** in  $\text{DMSO-d}_6$  after 72 h

**Table S1.** Crystal data and structure refinement for ligands

|                                               | <b>L1</b>                                                         | <b>L3</b>                                                         | <b>L4</b>                                                        |
|-----------------------------------------------|-------------------------------------------------------------------|-------------------------------------------------------------------|------------------------------------------------------------------|
| Empirical formula                             | C <sub>12</sub> H <sub>10</sub> N <sub>2</sub> OS <sub>2</sub>    | C <sub>13</sub> H <sub>12</sub> N <sub>2</sub> OS <sub>2</sub>    | C <sub>16</sub> H <sub>12</sub> N <sub>2</sub> OS <sub>2</sub>   |
| Formula weight                                | 262.34                                                            | 276.37                                                            | 312.40                                                           |
| Temperature (K)                               | 110.15                                                            | 150.15                                                            | 150.15                                                           |
| Wavelength (Å)                                | 0.71073                                                           | 0.71073                                                           | 0.71073                                                          |
| Crystal system                                | Monoclinic                                                        | Triclinic                                                         | Monoclinic                                                       |
| Space group                                   | <i>P 1 21/n 1</i>                                                 | <i>P-1</i>                                                        | <i>P 1 21/c 1</i>                                                |
| <i>a</i> (Å)                                  | 9.669(2)                                                          | 6.0928(13)                                                        | 14.808(3)                                                        |
| <i>b</i> (Å)                                  | 4.7975(12)                                                        | 8.8375(19)                                                        | 5.9200(13)                                                       |
| <i>c</i> (Å)                                  | 25.794(6)                                                         | 12.646(3)                                                         | 16.679(4)                                                        |
| $\alpha$ (°)                                  | 90                                                                | 89.795(2)                                                         | 90                                                               |
| $\beta$ (°)                                   | 98.061(2)                                                         | 84.279(2)                                                         | 103.112(3)                                                       |
| $\gamma$ (°)                                  | 90                                                                | 71.621(2)                                                         | 90                                                               |
| Volume (Å <sup>3</sup> )                      | 1184.6(5)                                                         | 642.7(2)                                                          | 1424.0(5)                                                        |
| <i>Z</i>                                      | 4                                                                 | 2                                                                 | 4                                                                |
| Density (calculated)<br>Mg/m <sup>3</sup>     | 1.471                                                             | 1.428                                                             | 1.457                                                            |
| Absorption<br>coefficient (mm <sup>-1</sup> ) | 0.432                                                             | 0.402                                                             | 0.373                                                            |
| <i>F</i> (000)                                | 544                                                               | 288                                                               | 648                                                              |
| Crystal size (mm <sup>3</sup> )               | 0.58x0.4x 0.35                                                    | 0.57x0.54x0.48                                                    | 0.54x0.54x 0.12                                                  |
| Theta range for data<br>collection (°)        | 2.165 to 27.483                                                   | 2.430 to 27.485                                                   | 1.412 to 27.421                                                  |
| Index ranges                                  | -12<= <i>h</i> <=12,<br>-6<= <i>k</i> <=6,<br>-33<= <i>l</i> <=33 | -7<= <i>h</i> <=7,<br>-11<= <i>k</i> <=11,<br>-16<= <i>l</i> <=16 | 19<= <i>h</i> <=19,<br>-7<= <i>k</i> <=7,<br>-21<= <i>l</i> <=21 |

|                                                  |                                    |                                    |                                    |
|--------------------------------------------------|------------------------------------|------------------------------------|------------------------------------|
| Reflections collected                            | 12786                              | 7387                               | 24391                              |
| Independent reflections [R(int)]                 | 2679 [R(int) = 0.0431]             | 2887[R(int) = 0.0310]              | 3221 [R(int) = 0.0633]             |
| Completeness to theta = 25.242                   | 99.8                               | 99.0                               | 99.8                               |
| Absorption correction                            | Semi-empirical from equivalents    | Semi-empirical from equivalents    | Semi-empirical from equivalents    |
| Max. and min. transmission                       | 0.7456 and 0.5881                  | 0.7456 and 0.5125                  | 0.7456 and 0.3326                  |
| Refinement method                                | Full-matrix least-squares on $F^2$ | Full-matrix least-squares on $F^2$ | Full-matrix least-squares on $F^2$ |
| Data / restraints / parameter                    | 2679 / 0 / 154                     | 2887 / 0 / 163                     | 3221 / 13 / 201                    |
| Goodness-of-fit on $F^2$                         | 1.130                              | 1.066                              | 1.059                              |
| Final R indices [I>2sigma(I)]                    | R1 = 0.0362<br>wR2 = 0.0821        | R1 = 0.0334<br>wR2 = 0.0863        | R1 = 0.0445<br>wR2 = 0.1189        |
| R indices (all data)                             | R1 = 0.0417<br>wR2 = 0.0846        | R1 = 0.0353<br>wR2 = 0.0873        | R1 = 0.0497<br>wR2 = 0.1264        |
| Largest diff. peak and hole (e.Å <sup>-3</sup> ) | 0.333 and -0.271                   | 0.287 and -0.419                   | 0.499 and -0.515                   |

---
